# Supplementary material
Source: publisher site journal article supplement (https://static.cambridge.org/content/id/urn:cambridge.org:id:article:S1755773919000250/resource/name/S1755773919000250supp002.docx)
Supplement: Supplementary file 1 [file S1755773919000250supp002.docx]

**Online appendix A**

**Table A.1.** Cases included in the analysis

| **Choice Set Size** | **Manifestos Project** | **Chapel Hill Expert Survey** | **Party System Polarization Index** |
| --- | --- | --- | --- |
| Armenia 2007 | Armenia 2007 |  |  |
| Armenia 2012 | Armenia 2012 |  |  |
| Australia 1946 | Australia 1946 |  |  |
| Australia 1949 | Australia 1949 |  |  |
| Australia 1951 | Australia 1951 |  |  |
| Australia 1954 | Australia 1954 |  |  |
| Australia 1955 | Australia 1955 |  |  |
| Australia 1958 | Australia 1958 |  |  |
| Australia 1961 | Australia 1961 |  |  |
| Australia 1963 | Australia 1963 |  |  |
| Australia 1966 | Australia 1966 |  |  |
| Australia 1969 | Australia 1969 |  |  |
| Australia 1972 | Australia 1972 |  |  |
| Australia 1974 | Australia 1974 |  |  |
| Australia 1975 | Australia 1975 |  |  |
| Australia 1977 | Australia 1977 |  |  |
| Australia 1980 | Australia 1980 |  |  |
| Australia 1983 | Australia 1983 |  |  |
| Australia 1984 | Australia 1984 |  |  |
| Australia 1987 | Australia 1987 |  |  |
| Australia 1990 | Australia 1990 |  |  |
| Australia 1993 | Australia 1993 |  |  |
| Australia 1996 | Australia 1996 |  | Australia 1996 |
| Australia 1998 | Australia 1998 |  |  |
| Australia 2001 | Australia 2001 |  |  |
| Australia 2004 | Australia 2004 |  | Australia 2004 |
| Australia 2007 | Australia 2007 |  | Australia 2007 |
| Australia 2010 | Australia 2010 |  |  |
| Australia 2013 | Australia 2013 |  | Australia 2013 |
| Bulgaria 1991 | Bulgaria 1991 |  |  |
| Bulgaria 1994 | Bulgaria 1994 |  |  |
| Bulgaria 1997 | Bulgaria 1997 |  |  |
| Bulgaria 2001 | Bulgaria 2001 | Bulgaria 2001 | Bulgaria 2001 |
| Bulgaria 2005 | Bulgaria 2005 | Bulgaria 2005 |  |
| Bulgaria 2009 | Bulgaria 2009 | Bulgaria 2009 |  |
| Bulgaria 2013 | Bulgaria 2013 | Bulgaria 2013 |  |
| Bulgaria 2014 |  | Bulgaria 2014 | Bulgaria 2014 |
| Canada 1945 | Canada 1945 |  |  |

| **Choice Set Size** | **Manifestos Project** | **Chapel Hill Expert Survey** | **Party System Polarization Index** |
| --- | --- | --- | --- |
| Canada 1949 | Canada 1949 |  |  |
| Canada 1953 | Canada 1953 |  |  |
| Canada 1957 | Canada 1957 |  |  |
| Canada 1958 | Canada 1958 |  |  |
| Canada 1962 | Canada 1962 |  |  |
| Canada 1963 | Canada 1963 |  |  |
| Canada 1965 | Canada 1965 |  |  |
| Canada 1968 | Canada 1968 |  |  |
| Canada 1972 | Canada 1972 |  |  |
| Canada 1974 | Canada 1974 |  |  |
| Canada 1979 | Canada 1979 |  |  |
| Canada 1980 | Canada 1980 |  |  |
| Canada 1984 | Canada 1984 |  |  |
| Canada 1988 | Canada 1988 |  |  |
| Canada 1993 | Canada 1993 |  |  |
| Canada 1997 | Canada 1997 |  | Canada 1997 |
| Canada 2000 | Canada 2000 |  |  |
| Canada 2004 | Canada 2004 |  | Canada 2004 |
| Canada 2006 | Canada 2006 |  |  |
| Canada 2008 | Canada 2008 |  | Canada 2008 |
| Canada 2011 | Canada 2011 |  | Canada 2011 |
| Canada 2015 | Canada 2015 |  |  |
| Croatia 2007 | Croatia 2007 |  | Croatia 2007 |
| Czech Republic 1990 | Czech Republic 1990 |  |  |
| Czech Republic 1992 | Czech Republic 1992 |  |  |
| Czech Republic 1996 | Czech Republic 1996 |  | Czech Republic 1996 |
| Czech Republic 1998 | Czech Republic 1998 |  |  |
| Czech Republic 2002 | Czech Republic 2002 | Czech Republic 2002 | Czech Republic 2002 |
| Czech Republic 2006 | Czech Republic 2006 | Czech Republic 2006 | Czech Republic 2006 |
| Czech Republic 2010 | Czech Republic 2010 | Czech Republic 2010 | Czech Republic 2010 |
| Czech Republic 2013 | Czech Republic 2013 | Czech Republic 2013 | Czech Republic 2013 |
| Denmark 2001 | Denmark 2001 | Denmark 2001 | Denmark 2001 |
| Denmark 2005 | Denmark 2005 | Denmark 2005 |  |
| Denmark 2007 | Denmark 2007 | Denmark 2007 | Denmark 2007 |
| Denmark 2011 | Denmark 2011 | Denmark 2011 |  |
| Denmark 2015 |  | Denmark 2015 |  |
| Estonia 1992 | Estonia 1992 |  |  |
| Estonia 1995 | Estonia 1995 |  |  |
| Estonia 1999 | Estonia 1999 |  |  |
| Estonia 2003 | Estonia 2003 |  |  |

| **Choice Set Size** | **Manifestos Project** | **Chapel Hill Expert Survey** | **Party System Polarization Index** |
| --- | --- | --- | --- |
| Estonia 2007 | Estonia 2007 | Estonia 2007 |  |
| Estonia 2011 | Estonia 2011 | Estonia 2011 | Estonia 2011 |
| Estonia 2015 | Estonia 2015 | Estonia 2015 |  |
| Finland 1999 | Finland 1999 | Finland 1999 |  |
| Finland 2003 | Finland 2003 | Finland 2003 | Finland 2003 |
| Finland 2007 | Finland 2007 | Finland 2007 | Finland 2007 |
| Finland 2011 | Finland 2011 | Finland 2011 | Finland 2011 |
| Finland 2015 |  | Finland 2015 | Finland 2015 |
| France 1986 | France 1986 |  |  |
| France 2007 | France 2007 | France 2007 | France 2007 |
| France 2012 | France 2012 | France 2012 | France 2012 |
| Ireland 2002 | Ireland 2002 | Ireland 2002 | Ireland 2002 |
| Ireland 2007 | Ireland 2007 | Ireland 2007 | Ireland 2007 |
| Ireland 2011 | Ireland 2011 | Ireland 2011 | Ireland 2011 |
| Israel 1951 | Israel 1951 |  |  |
| Israel 1955 | Israel 1955 |  |  |
| Israel 1959 | Israel 1959 |  |  |
| Israel 1961 | Israel 1961 |  |  |
| Israel 1965 | Israel 1965 |  |  |
| Israel 1969 | Israel 1969 |  |  |
| Israel 1973 | Israel 1973 |  |  |
| Israel 1977 | Israel 1977 |  |  |
| Israel 1981 | Israel 1981 |  |  |
| Israel 1984 | Israel 1984 |  |  |
| Israel 1988 | Israel 1988 |  |  |
| Israel 1992 | Israel 1992 |  |  |
| Israel 1996 | Israel 1996 |  | Israel 1996 |
| Israel 1999 | Israel 1999 |  |  |
| Israel 2003 | Israel 2003 |  | Israel 2003 |
| Israel 2006 |  |  | Israel 2006 |
| Israel 2009 |  |  |  |
| Israel 2013 |  |  | Israel 2013 |
| Israel 2015 | Israel 2015 |  |  |
| Japan 1960 | Japan 1960 |  |  |
| Japan 1963 | Japan 1963 |  |  |
| Japan 1967 | Japan 1967 |  |  |
| Japan 1969 | Japan 1969 |  |  |
| Japan 1972 | Japan 1972 |  |  |
| Japan 1976 | Japan 1976 |  |  |
| Japan 1979 | Japan 1979 |  |  |
| Japan 1980 | Japan 1980 |  |  |

| **Choice Set Size** | **Manifestos Project** | **Chapel Hill Expert Survey** | **Party System Polarization Index** |
| --- | --- | --- | --- |
| Japan 1983 | Japan 1983 |  |  |
| Japan 1986 | Japan 1986 |  |  |
| Japan 1990 | Japan 1990 |  |  |
| Japan 1993 | Japan 1993 |  |  |
| Latvia 1998 | Latvia 1998 |  |  |
| Latvia 2002 | Latvia 2002 | Latvia 2002 |  |
| Luxembourg 1951 | Luxembourg 1951 |  |  |
| Luxembourg 1954 | Luxembourg 1954 |  |  |
| Luxembourg 1959 | Luxembourg 1959 |  |  |
| Luxembourg 1964 | Luxembourg 1964 |  |  |
| Luxembourg 1968 | Luxembourg 1968 |  |  |
| Luxembourg 1974 | Luxembourg 1974 |  |  |
| Luxembourg 1979 | Luxembourg 1979 |  |  |
| Luxembourg 1984 | Luxembourg 1984 |  |  |
| Luxembourg 1989 | Luxembourg 1989 |  |  |
| Luxembourg 1994 | Luxembourg 1994 |  |  |
| Macedonia 2002 | Macedonia 2002 |  |  |
| Macedonia 2006 | Macedonia 2006 |  |  |
| Macedonia 2008 | Macedonia 2008 |  |  |
| Macedonia 2011 | Macedonia 2011 |  |  |
| Macedonia 2014 | Macedonia 2014 |  |  |
| New Zealand 1946 | New Zealand 1946 |  |  |
| New Zealand 1949 | New Zealand 1949 |  |  |
| New Zealand 1951 | New Zealand 1951 |  |  |
| New Zealand 1954 | New Zealand 1954 |  |  |
| New Zealand 1957 | New Zealand 1957 |  |  |
| New Zealand 1960 | New Zealand 1960 |  |  |
| New Zealand 1963 | New Zealand 1963 |  |  |
| New Zealand 1966 | New Zealand 1966 |  |  |
| New Zealand 1969 | New Zealand 1969 |  |  |
| New Zealand 1972 | New Zealand 1972 |  |  |
| New Zealand 1975 | New Zealand 1975 |  |  |
| New Zealand 1978 | New Zealand 1978 |  |  |
| New Zealand 1981 | New Zealand 1981 |  |  |
| New Zealand 1984 | New Zealand 1984 |  |  |
| New Zealand 1987 | New Zealand 1987 |  |  |
| New Zealand 1990 | New Zealand 1990 |  |  |
| New Zealand 1993 | New Zealand 1993 |  |  |
| Poland 1991 | Poland 1991 |  |  |
| Poland 1997 | Poland 1997 |  | Poland 1997 |
| Poland 2001 | Poland 2001 | Poland 2001 | Poland 2001 |

| **Choice Set Size** | **Manifestos Project** | **Chapel Hill Expert Survey** | **Party System Polarization Index** |
| --- | --- | --- | --- |
| Poland 2005 | Poland 2005 | Poland 2005 | Poland 2005 |
| Poland 2007 | Poland 2007 | Poland 2007 | Poland 2007 |
| Poland 2011 | Poland 2011 | Poland 2011 | Poland 2011 |
| Romania 1990 | Romania 1990 |  |  |
| Romania 1992 | Romania 1992 |  |  |
| Romania 1996 | Romania 1996 |  | Romania 1996 |
| Romania 2000 | Romania 2000 | Romania 2000 |  |
| Slovakia 1998 | Slovakia 1998 |  |  |
| Slovakia 2002 | Slovakia 2002 | Slovakia 2002 |  |
| Slovakia 2006 | Slovakia 2006 | Slovakia 2006 |  |
| Slovakia 2010 | Slovakia 2010 | Slovakia 2010 | Slovakia 2010 |
| Slovakia 2012 | Slovakia 2012 | Slovakia 2012 |  |
| Slovakia 2016 |  | Slovakia 2016 | Slovakia 2016 |
| South Africa 1994 | South Africa 1994 |  |  |
| South Africa 1999 | South Africa 1999 |  |  |
| South Africa 2004 | South Africa 2004 |  |  |
| South Africa 2009 | South Africa 2009 |  | South Africa 2009 |
| South Africa 2014 | South Africa 2014 |  | South Africa 2014 |
| Spain 2000 | Spain 2000 | Spain 2000 | Spain 2000 |
| Spain 2004 | Spain 2004 | Spain 2004 | Spain 2004 |
| Spain 2008 | Spain 2008 | Spain 2008 | Spain 2008 |
| Spain 2011 | Spain 2011 | Spain 2011 |  |
| Spain 2015 | Spain 2015 | Spain 2015 |  |
| Spain 2016 |  | Spain 2016 |  |
| Sweden 2002 | Sweden 2002 | Sweden 2002 | Sweden 2002 |
| Sweden 2010 | Sweden 2010 | Sweden 2010 |  |
| Sweden 2014 |  | Sweden 2014 | Sweden 2014 |
| Switzerland 1999 | Switzerland 1999 |  | Switzerland 1999 |
| Switzerland 2003 | Switzerland 2003 |  | Switzerland 2003 |
| Switzerland 2007 | Switzerland 2007 |  | Switzerland 2007 |
| Switzerland 2011 | Switzerland 2011 |  | Switzerland 2011 |
| Switzerland 2015 |  |  |  |
| Turkey 1983 | Turkey 1983 |  |  |
| Turkey 1987 | Turkey 1987 |  |  |
| Turkey 1991 | Turkey 1991 |  |  |
| Turkey 1995 | Turkey 1995 |  |  |
| Turkey 1999 | Turkey 1999 |  |  |
| Turkey 2002 | Turkey 2002 |  |  |
| Turkey 2007 | Turkey 2007 |  |  |
| Turkey 2011 | Turkey 2011 |  | Turkey 2011 |
| Turkey 2015 (June) | Turkey 2015 (June) |  |  |

| **Choice Set Size** | **Manifestos Project** | **Chapel Hill Expert Survey** | **Party System Polarization Index** |
| --- | --- | --- | --- |
| Turkey 2015 (November) | Turkey 2015 (November) |  |  |
| United Kingdom 1945 | United Kingdom 1945 |  |  |
| United Kingdom 1950 | United Kingdom 1950 |  |  |
| United Kingdom 1951 | United Kingdom 1951 |  |  |
| United Kingdom 1955 | United Kingdom 1955 |  |  |
| United Kingdom 1959 | United Kingdom 1959 |  |  |
| United Kingdom 1964 | United Kingdom 1964 |  |  |
| United Kingdom 1966 | United Kingdom 1966 |  |  |
| United Kingdom 1970 | United Kingdom 1970 |  |  |
| United Kingdom 1974 (February) | United Kingdom 1974 (February) |  |  |
| United Kingdom 1974 (October) | United Kingdom 1974 (October) |  |  |
| United Kingdom 1979 | United Kingdom 1979 |  |  |
| United Kingdom 1983 | United Kingdom 1983 |  |  |
| United Kingdom 1987 | United Kingdom 1987 |  |  |
| United Kingdom 1992 | United Kingdom 1992 |  |  |
| United Kingdom 1997 | United Kingdom 1997 | United Kingdom 1997 | United Kingdom 1997 |
| United Kingdom 2001 | United Kingdom 2001 | United Kingdom 2001 |  |
| United Kingdom 2005 | United Kingdom 2005 | United Kingdom 2005 | United Kingdom 2005 |
| United Kingdom 2010 | United Kingdom 2010 | United Kingdom 2010 |  |
| United Kingdom 2015 | United Kingdom 2015 | United Kingdom 2015 | United Kingdom 2015 |
